# Supplementary material for: Interarm Blood Pressure Difference is Associated with Early Neurological Deterioration, Poor Short-Term Functional Outcome, and Mortality in Noncardioembolic Stroke Patients
Source: PubMed Central journal article supplement — J Clin Neurol. 2018 Sep 28;14(4):555–65. doi: 10.3988/jcn.2018.14.4.555 (PMC6172494; doi:10.3988/jcn.2018.14.4.555), 2018-09-28
Supplement: jcn-14-555-s001.pdf [file jcn-14-555-s001.pdf]

## SUPPLEMENTARY MATERIAL

The risk factors for hypertension have been defined in detail previously.<sup>1</sup> In brief, hypertension was defined as being present when a patient had been taking blood pressure-lowering agents, or had a resting systolic blood pressure  $\geq 140$  mm Hg or diastolic blood pressure  $\geq 90$  mm Hg in repeated measurements. Diabetes mellitus was diagnosed when the patient had a fasting blood glucose level  $\geq 7.0$  mmol/L, or was being treated with oral glucose-lowering medications or insulin. Hyperlipidemia was diagnosed if the patient had total cholesterol  $\geq 6.2$  mmol/L, low-density lipoprotein  $\geq 4.1$  mmol/L, or had taken lipid-lowering medications after a diagnosis of hyperlipidemia. Patients were defined as smokers if they were current smokers or had stopped smoking within 1 year before the index stroke. Previous stroke was defined as a previous stroke-like symptom and the presence of an ischemic lesion confirmed in brain imaging. Coronary artery disease was defined as a history of myocardial infarction, unstable angina, or angiographically confirmed coronary artery occlusive disease. Metabolic syndrome was diagnosed when a patient had more than three of the following components: abdominal obesity (waist circumference  $>102$  cm for men and  $>88$  cm for women), triglycerides  $\geq 1.7$  mmol/L, low level of high-density lipoprotein ( $<1.04$  mmol/L for men and  $<1.30$  mmol/L for women), resting systolic blood pressure  $>130$  mm Hg or resting diastolic blood pressure  $>85$  mm Hg, or fasting glucose  $\geq 6.1$  mmol/L. A mean weekly alcohol intake that regularly exceeded 300 g of ethanol was classified as a high alcohol intake.<sup>2</sup> Antihypertensive treatment after admission was defined as taking intravenous or oral antihypertensive agents within 7 days of admission. Any antihypertensive medications that the patient used before the index stroke were stopped after admission. The threshold for starting antihypertensive therapy was a systolic blood pressure of 200–220 mm Hg or a diastolic blood pressure of 120 mm Hg; however, in patients receiving thrombolytic treatment these thresholds were 185 mm Hg and 110 mm Hg, respectively. Left ventricular hypertrophy was diagnosed when electrocardiography findings matched at least one of the Sokolow-Lyon index, the Romhilt-Estes point score system, and the Cornell voltage criteria.<sup>3</sup>

## REFERENCES

1. Song TJ, Park JH, Choi KH, Kim JH, Choi Y, Chang Y, et al. Is obstructive sleep apnea associated with the presence of intracranial cerebral atherosclerosis? *Sleep Breath* 2017;21:639-646.
2. Song TJ, Kim YD, Yoo J, Kim J, Chang HJ, Hong GR, et al. Association between aortic atheroma and cerebral small vessel disease in patients with ischemic stroke. *J Stroke* 2016;18:312-320.
3. Schillaci G, Verdecchia P, Borgioni C, Ciucci A, Guerrieri M, Zampi I, et al. Improved electrocardiographic diagnosis of left ventricular hypertrophy. *Am J Cardiol* 1994;74:714-719.
