# Supplementary material for: Interarm Blood Pressure Difference is Associated with Early Neurological Deterioration, Poor Short-Term Functional Outcome, and Mortality in Noncardioembolic Stroke Patients
Source: PubMed Central journal article supplement — J Clin Neurol. 2018 Sep 28;14(4):555–65. doi: 10.3988/jcn.2018.14.4.555 (PMC6172494; doi:10.3988/jcn.2018.14.4.555), 2018-09-28
Supplement: jcn-14-555-s002.pdf [file jcn-14-555-s002.pdf]

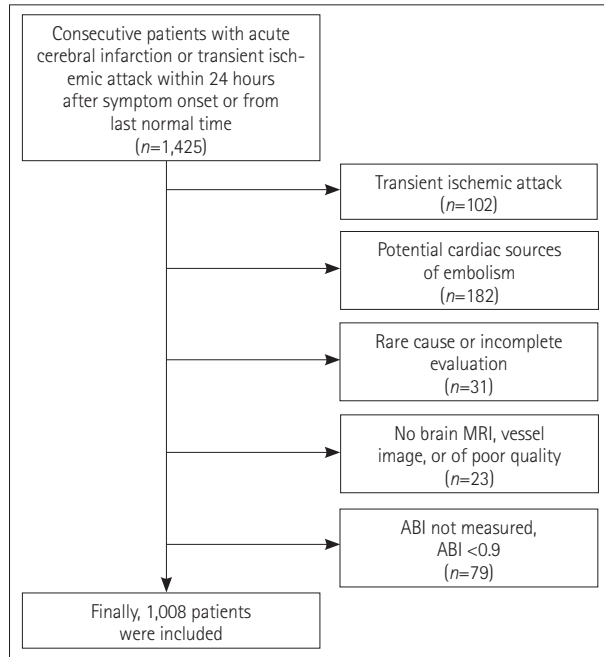

**Supplementary Fig. 1.** Flowchart of participants according to inclusion and exclusion criteria. ABI: ankle-brachial index.
