# Supplementary material for: Interarm Blood Pressure Difference is Associated with Early Neurological Deterioration, Poor Short-Term Functional Outcome, and Mortality in Noncardioembolic Stroke Patients
Source: PubMed Central journal article supplement — J Clin Neurol. 2018 Sep 28;14(4):555–65. doi: 10.3988/jcn.2018.14.4.555 (PMC6172494; doi:10.3988/jcn.2018.14.4.555), 2018-09-28
Supplement: jcn-14-555-s003.pdf [file jcn-14-555-s003.pdf]

**Supplementary Table 1.** Comparison of acute noncardioembolic stroke patients who were included and excluded during the study period

|                                    | <b>Included<br/>(n=1,008)</b> | <b>Not included<br/>(n=417)</b> | <b>p</b> |
|------------------------------------|-------------------------------|---------------------------------|----------|
| Demographic characteristics        |                               |                                 |          |
| Sex, male                          | 633 (62.8)                    | 267 (64.0)                      | 0.661    |
| Age, years                         | 62.9±11.7                     | 65.5±9.5                        | 0.001    |
| Body mass index, kg/m <sup>2</sup> | 24.0±3.1                      | 24.3±2.9                        | 0.209    |
| Risk factors                       |                               |                                 |          |
| Hypertension                       | 636 (63.1)                    | 277 (66.4)                      | 0.233    |
| Diabetes mellitus                  | 335 (33.2)                    | 144 (34.5)                      | 0.637    |
| Hypercholesterolemia               | 215 (21.3)                    | 74 (17.7)                       | 0.126    |
| Smoking                            | 303 (30.1)                    | 113 (27.1)                      | 0.263    |
| Alcohol intake                     | 139 (13.8)                    | 55 (13.2)                       | 0.764    |
| Coronary artery disease            | 190 (18.8)                    | 77 (18.5)                       | 0.866    |
| Metabolic syndrome                 | 423 (42.0)                    | 193 (46.3)                      | 0.134    |
| Left ventricular hypertrophy       | 101 (10.0)                    | 40 (9.6)                        | 0.806    |

Data are *n* (%) or mean±SD values.
