# Supplementary material for: Interarm Blood Pressure Difference is Associated with Early Neurological Deterioration, Poor Short-Term Functional Outcome, and Mortality in Noncardioembolic Stroke Patients
Source: PubMed Central journal article supplement — J Clin Neurol. 2018 Sep 28;14(4):555–65. doi: 10.3988/jcn.2018.14.4.555 (PMC6172494; doi:10.3988/jcn.2018.14.4.555), 2018-09-28
Supplement: jcn-14-555-s004.pdf [file jcn-14-555-s004.pdf]

**Supplementary Table 2.** Comparison of clinical characteristics according to the presence of END including cardioembolic stroke

|                                                   | Total (n=1,190) | No END (n=980) | END (n=210) | p     |
|---------------------------------------------------|-----------------|----------------|-------------|-------|
| Demographic characteristics                       |                 |                |             |       |
| Sex, male                                         | 738 (62.0)      | 606 (61.8)     | 132 (62.9)  | 0.782 |
| Age, years                                        | 65.3±3.8        | 63.4±1.6       | 70.9±4.4    | 0.001 |
| Body mass index, kg/m <sup>2</sup>                | 23.8±3.5        | 23.7±3.3       | 23.9±3.5    | 0.835 |
| Risk factors                                      |                 |                |             |       |
| Hypertension                                      | 768 (64.5)      | 640 (65.3)     | 128 (61.0)  | 0.231 |
| Diabetes mellitus                                 | 403 (33.9)      | 329 (33.6)     | 74 (35.2)   | 0.643 |
| Hypercholesterolemia                              | 262 (22.0)      | 210 (21.4)     | 52 (24.8)   | 0.290 |
| Smoking                                           | 346 (29.1)      | 267 (27.2)     | 79 (37.6)   | 0.003 |
| Alcohol intake                                    | 170 (14.3)      | 140 (14.3)     | 30 (14.3)   | 1.000 |
| Coronary artery disease                           | 223 (18.7)      | 177 (18.1)     | 46 (21.9)   | 0.195 |
| Metabolic syndrome                                | 502 (42.2)      | 417 (42.6)     | 85 (40.5)   | 0.581 |
| Left ventricular hypertrophy                      | 127 (10.7)      | 100 (10.2)     | 27 (12.9)   | 0.258 |
| Prior medication                                  |                 |                |             |       |
| Antithrombotic                                    | 186 (15.6)      | 161 (16.4)     | 25 (11.9)   | 0.101 |
| Antihypertensive                                  | 672 (56.6)      | 562 (57.3)     | 110 (52.4)  | 0.188 |
| Statin                                            | 171 (14.4)      | 149 (15.2)     | 22 (10.5)   | 0.076 |
| Antihypertensive treatment before ABI examination | 135 (11.3)      | 112 (11.4)     | 23 (11.0)   | 0.843 |
| NIHSS score                                       | 4 [1–5]         | 2 [1–4]        | 5 [2–8]     | 0.001 |
| Stroke subtype                                    |                 |                |             | 0.001 |
| Large-artery atherosclerosis                      | 313 (26.3)      | 253 (25.8)     | 60 (28.6)   |       |
| Cardioembolism                                    | 182 (15.3)      | 127 (13.0)     | 55 (26.2)   |       |
| Small-vessel occlusion                            | 272 (22.9)      | 235 (24.0)     | 37 (17.6)   |       |
| Undetermined negative                             | 348 (29.2)      | 302 (30.8)     | 46 (21.9)   |       |
| Undetermined multiple causes                      | 75 (6.3)        | 63 (6.4)       | 12 (5.7)    |       |
| Cerebral atherosclerosis                          |                 |                |             | 0.001 |
| ECAS                                              | 139 (11.7)      | 110 (11.2)     | 29 (13.8)   |       |
| ICAS                                              | 244 (20.5)      | 181 (18.5)     | 63 (30.0)   |       |
| Both ECAS and ICAS                                | 83 (7.0)        | 59 (6.0)       | 24 (11.4)   |       |
| HGWMHs                                            | 395 (33.2)      | 316 (32.2)     | 79 (37.6)   | 0.133 |
| Thrombolytic therapy                              | 149 (12.5)      | 87 (8.9)       | 62 (29.5)   | 0.001 |
| Blood laboratory findings                         |                 |                |             |       |
| Fasting glucose, mg/dL                            | 116.0±42.2      | 114.1±41.2     | 115.3±44.2  | 0.351 |
| White blood cell count, ×10 <sup>3</sup> /μL      | 8.4±3.01        | 8.2±3.1        | 8.7±2.5     | 0.049 |
| Hemoglobin, mg/dL                                 | 13.7±2.0        | 13.8±2.0       | 13.6±2.0    | 0.147 |
| Platelet count, ×10 <sup>3</sup> /μL              | 244.4±77.8      | 242.2±74.2     | 246.1±77.5  | 0.523 |
| Total cholesterol, mg/dL                          | 175.3±44.0      | 176.3±43.7     | 174.5±44.5  | 0.431 |
| Triglycerides, mg/dL                              | 118.4±75.2      | 119.2±75.7     | 123.2±77.1  | 0.627 |
| High-density lipoprotein, mg/dL                   | 42.0±11.0       | 42.3±11.2      | 41.8±10.9   | 0.821 |
| Low-density lipoprotein, mg/dL                    | 110.7±38.5      | 111.4±37.9     | 109.3±40.3  | 0.676 |
| ABI parameters                                    |                 |                |             |       |
| Arm SBP, mm Hg                                    | 150.1±22.1      | 149.9±22.3     | 152.1±22.4  | 0.376 |
| Arm DBP, mm Hg                                    | 85.7±12.1       | 85.8±12.3      | 85.6±11.9   | 0.865 |
| baPWV, m/s                                        | 19.7±5.1        | 19.6±4.9       | 22.5±5.4    | 0.012 |
| Pulse rate, beats/min                             | 75.4±13.8       | 72.3±14.9      | 79.8±12.3   | 0.121 |
| ABI                                               | 1.1±0.1         | 1.1±0.1        | 1.0±0.1     | 0.754 |
| IASBD                                             |                 |                |             |       |
| ≥5 mm Hg                                          | 447 (37.6)      | 353 (36.0)     | 94 (44.8)   | 0.018 |
| ≥10 mm Hg                                         | 129 (10.8)      | 94 (9.6)       | 35 (16.7)   | 0.003 |
| ≥15 mm Hg                                         | 22 (1.8)        | 11 (1.1)       | 11 (5.2)    | 0.001 |
| Absolute difference, mm Hg                        | 4.3±4.6         | 4.0±4.2        | 5.5±6.4     | 0.034 |
| IADBD                                             |                 |                |             |       |
| ≥5 mm Hg                                          | 353 (29.7)      | 263 (26.8)     | 90 (42.9)   | 0.001 |
| ≥10 mm Hg                                         | 75 (6.3)        | 48 (4.9)       | 27 (12.9)   | 0.001 |
| ≥15 mm Hg                                         | 27 (2.3)        | 12 (1.2)       | 15 (7.1)    | 0.001 |
| Absolute difference, mm Hg                        | 3.5±3.6         | 3.1±2.9        | 4.8±5.3     | 0.023 |
| Both IASBD ≥5 mm Hg and IADBD ≥5 mm Hg            | 204 (17.1)      | 147 (15.0)     | 57 (27.1)   | 0.001 |
| Both IASBD ≥10 mm Hg and IADBD ≥10 mm Hg          | 41 (3.4)        | 26 (2.7)       | 15 (7.1)    | 0.001 |

Data are n (%), mean±standard-deviation, or median [interquartile range] values.

ABI: ankle-brachial index, baPWV: brachial-ankle pulse wave velocity, DBP: diastolic blood pressure, ECAS: extracranial cerebral atherosclerosis, END: early neurological deterioration, HGWMHs: high-grade white-matter hyperintensities, IADBD: interarm diastolic blood pressure difference, IASBD: interarm systolic blood pressure difference, ICAS: intracranial cerebral atherosclerosis, NIHSS: National Institutes of Health Stroke Scale, SBP: systolic blood pressure.
