# Supplementary material for: Interarm Blood Pressure Difference is Associated with Early Neurological Deterioration, Poor Short-Term Functional Outcome, and Mortality in Noncardioembolic Stroke Patients
Source: PubMed Central journal article supplement — J Clin Neurol. 2018 Sep 28;14(4):555–65. doi: 10.3988/jcn.2018.14.4.555 (PMC6172494; doi:10.3988/jcn.2018.14.4.555), 2018-09-28
Supplement: jcn-14-555-s005.pdf [file jcn-14-555-s005.pdf]

**Supplementary Table 3.** Results from the multivariate analyses of END, poor functional outcome at 3 months, and long-term all-cause mortality after the index stroke including the cardioembolic stroke subtype according to IASBD and IADBD

|                                          | END*              |          | Poor functional outcome <sup>†</sup> |          | All-cause mortality <sup>‡</sup> |          |
|------------------------------------------|-------------------|----------|--------------------------------------|----------|----------------------------------|----------|
|                                          | OR (95% CI)       | <i>p</i> | OR (95% CI)                          | <i>p</i> | HR (95% CI)                      | <i>p</i> |
| <b>IASBD</b>                             |                   |          |                                      |          |                                  |          |
| ≥5 mm Hg                                 | 1.33 (0.99–2.04)  | 0.054    | 1.12 (0.83–1.53)                     | 0.412    | 1.16 (0.64–1.96)                 | 0.498    |
| ≥10 mm Hg                                | 1.45 (1.01–3.12)  | 0.032    | 1.96 (1.27–2.94)                     | 0.006    | 1.80 (1.13–3.21)                 | 0.031    |
| ≥15 mm Hg                                | 3.14 (1.04–7.81)  | 0.018    | 2.03 (1.19–3.82)                     | 0.005    | 3.12 (1.52–6.03)                 | 0.015    |
| Per 1-mm Hg increase                     | 1.03 (1.00–1.08)  | 0.002    | 1.03 (1.01–1.08)                     | 0.005    | 1.05 (1.01–1.09)                 | 0.007    |
| <b>IADBD</b>                             |                   |          |                                      |          |                                  |          |
| ≥5 mm Hg                                 | 1.84 (1.32–2.91)  | 0.041    | 1.26 (0.92–1.72)                     | 0.152    | 1.62 (1.03–3.16)                 | 0.045    |
| ≥10 mm Hg                                | 3.03 (1.62–5.43)  | 0.018    | 2.19 (1.14–2.84)                     | 0.005    | 3.12 (1.23–4.52)                 | 0.013    |
| ≥15 mm Hg                                | 4.31 (1.52–12.76) | 0.044    | 3.92 (1.30–6.53)                     | 0.043    | 6.21 (3.20–9.20)                 | 0.022    |
| Per 1-mm Hg increase                     | 1.08 (1.04–1.16)  | 0.002    | 1.05 (1.01–1.10)                     | 0.013    | 1.11 (1.03–1.19)                 | 0.001    |
| Both IASBD ≥5 mm Hg and IADBD ≥5 mm Hg   | 1.69 (1.24–4.08)  | 0.023    | 1.22 (0.85–1.83)                     | 0.236    | 1.62 (0.93–2.79)                 | 0.085    |
| Both IASBD ≥10 mm Hg and IADBD ≥10 mm Hg | 2.25 (0.94–6.34)  | 0.098    | 2.28 (1.35–5.36)                     | 0.035    | 7.63 (3.75–12.82)                | 0.019    |

\*Adjusted for sex, age, hypercholesterolemia, smoking, prior statin use, NIHSS score, stroke subtype, cerebral atherosclerosis, thrombolytic therapy, white blood cell count, and brachial-ankle pulse wave velocity, <sup>†</sup>Adjusted for sex, age, hypertension, metabolic syndrome, thrombolytic therapy, END, NIHSS score, stroke subtype, cerebral atherosclerosis, HGWMHs, and brachial-ankle pulse wave velocity, <sup>‡</sup>Adjusted for sex, age, hypertension, diabetes mellitus, metabolic syndrome, thrombolytic therapy, END, NIHSS score, stroke subtype, cerebral atherosclerosis, HGWMHs, and brachial-ankle pulse wave velocity.

END: early neurological deterioration, HGWMHs: high-grade white-matter hyperintensities, HR: hazard ratio, IADBD: interarm diastolic blood pressure difference, IASBD: interarm systolic blood pressure difference, NIHSS: National Institutes of Health Stroke Scale, OR: odds ratio.
